# Supplementary material
Source: PubMed Central journal article supplement (PMC11017870)
Supplement: NIHPP2024.02.05.578738v3-supplement-1.pdf [file NIHPP2024.02.05.578738v3-supplement-1.pdf]

## Supplementary material

**Supplemental Figure S1.** Development of functional connectivity and network topology in 2D murine hippocampal cultures.

**Supplemental Table S1.** MATLAB functions or code from other sources incorporated in MEA-NAP.

**Supplemental Table S2.** Comparison with other publicly available MEA analysis or functional connectivity tools.

**Supplemental Table S3.** Publicly available MEA analysis or functional connectivity tools.

**Supplemental Resource 1.** Sample MEA data from 2D human iPSC-derived NGN cortical cultures. Harvard Dataverse, <https://doi.org/10.7910/DVN/Z14LWA>

**Supplemental Resource 2.** Sample output folder from MEA-NAP for development of 2D human iPSC-derived NGN cortical cultures. Harvard Dataverse, <https://doi.org/10.7910/DVN/Z14LWA>

**Supplemental Resource 3.** Video tutorial for new users of MEA-NAP. Harvard Dataverse, <https://doi.org/10.7910/DVN/Z14LWA>

## Supplementary material

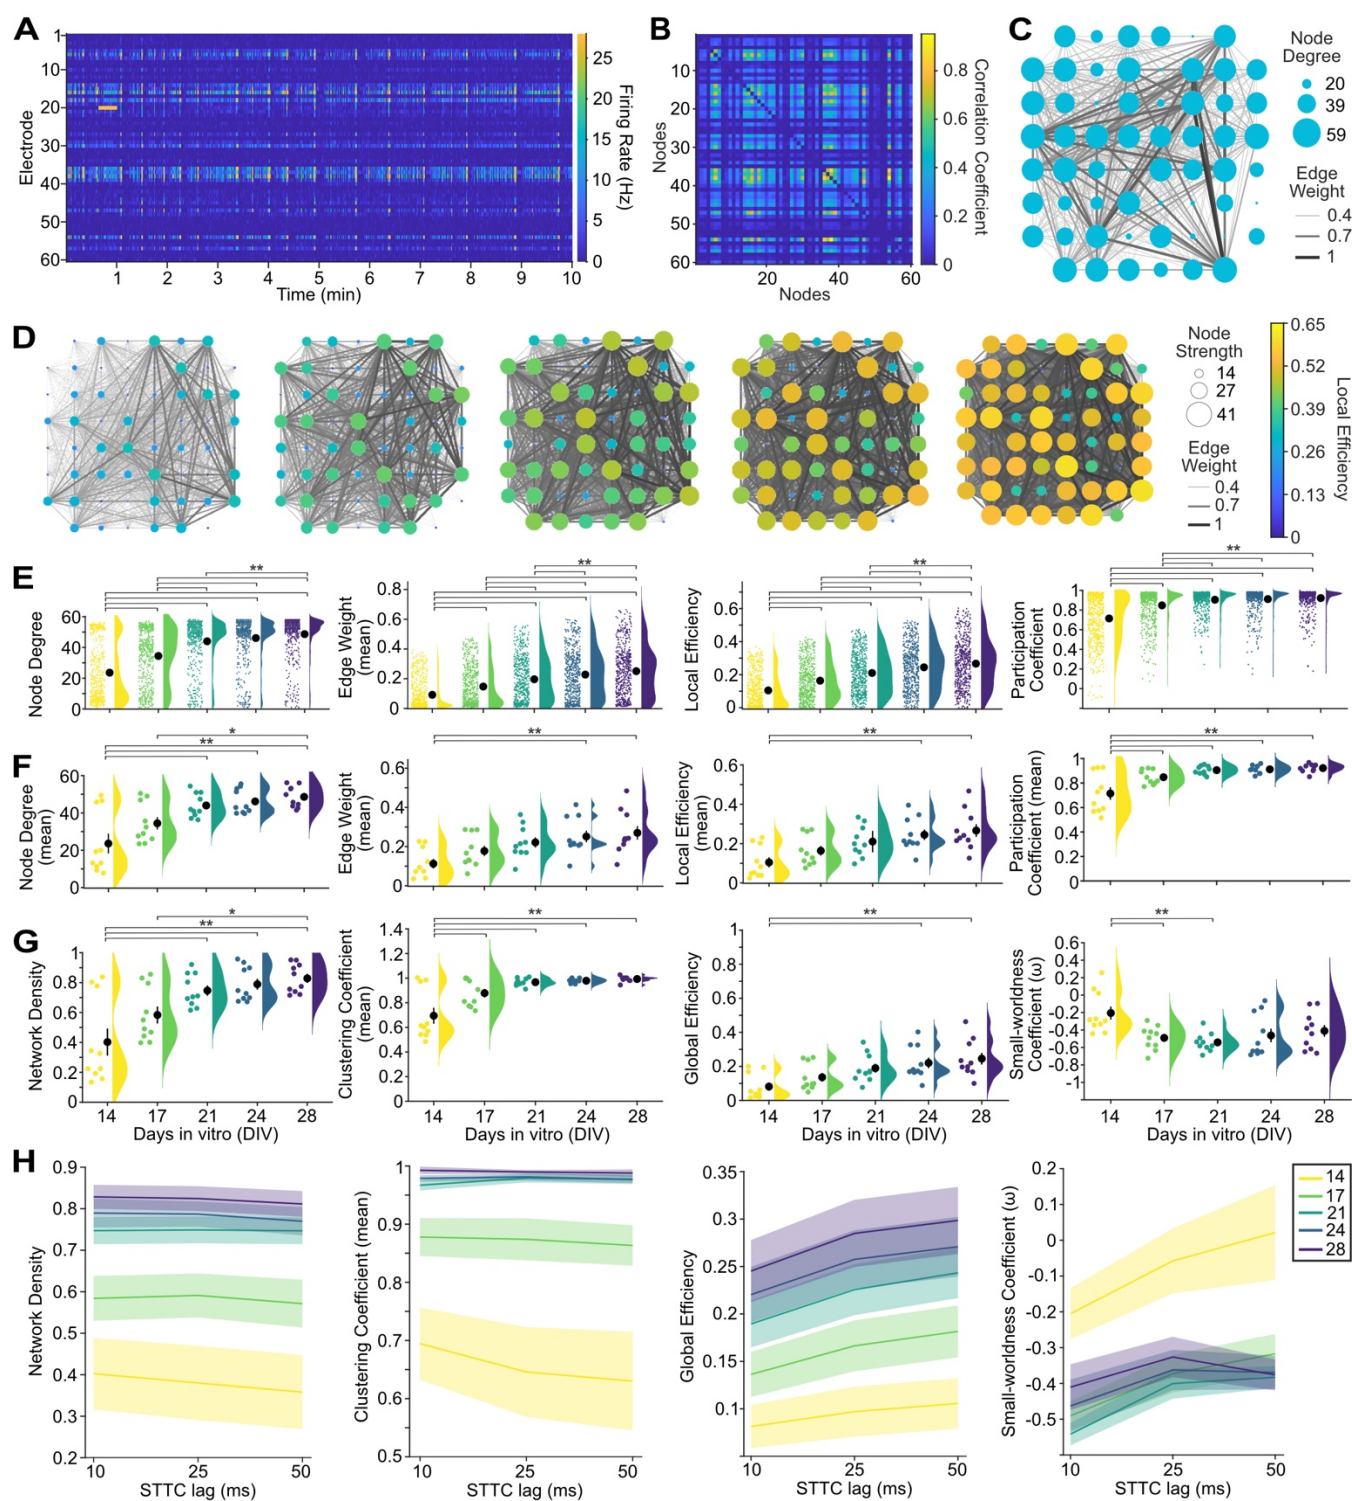

**Supplemental Figure S1. Development of functional connectivity and network topology in 2D murine hippocampal cultures.** **A.** Representative raster plot of spontaneous activity in a 10-minute microelectrode array (MEA) recording from primary mouse hippocampal culture. **B.** Adjacency matrix shows correlation coefficient (spike time tiling coefficient, STTC) for significant edges after probabilistic thresholding for recording in A. **C.** Graph of functional connectivity for recording in A. Nodes (circles) represent the activity observed at individual electrodes in the spatial arrangement of the MEA. Number of connections shown as node degree (circle size) and strength of connectivity as edge weight (line thickness). **D.** Development of functional connectivity in representative hippocampal cultures from days-

in-vitro (DIV) 14-28 including increase in node strength (circle size), edge weight (line thickness), and local efficiency (circle color). **E.** Comparison of nodal-level network metrics for electrodes (colored circles) from hippocampal cultures (n=10) for node degree, mean edge weight (per node), local efficiency, and participation coefficient. Scatter plots with mean (black circles)  $\pm$  SEM (error bars) and density curve for DIV 14-28. **F.** Comparison of recording-level network metrics (colored circles) for mean node degree, mean edge weight, mean local efficiency, and mean participation coefficient from DIV 14-28. **G.** Comparison of recording-level network metrics including network density, mean clustering coefficient, global efficiency, and small-worldness from DIV 14-28. **H.** Comparison of recording-level network metrics by STTC lag and developmental age (color, DIV 14-28). Means (lines)  $\pm$  SEM (shading). For panels E-G, a one-way ANOVA ( $p < 0.01$  for all plots) followed by the Tukey-Kramer method to calculate p-values adjusted for multiple post-hoc pairwise comparisons (\*\*  $p \leq 0.01$ , \*  $p < 0.05$ ).

| <b>Supplemental Table 1. Code from other sources incorporated in MEA-NAP</b>                                                                                                                                                                                                                   |                                                                                                                                |                                                                                                          |                                                                                                                                                                                                                                                                                                                     |
|------------------------------------------------------------------------------------------------------------------------------------------------------------------------------------------------------------------------------------------------------------------------------------------------|--------------------------------------------------------------------------------------------------------------------------------|----------------------------------------------------------------------------------------------------------|---------------------------------------------------------------------------------------------------------------------------------------------------------------------------------------------------------------------------------------------------------------------------------------------------------------------|
| Reference(s)                                                                                                                                                                                                                                                                                   | Description                                                                                                                    | Location in MEA-NAP                                                                                      | Source code                                                                                                                                                                                                                                                                                                         |
| <b>Methods - Spike detection</b>                                                                                                                                                                                                                                                               |                                                                                                                                |                                                                                                          |                                                                                                                                                                                                                                                                                                                     |
| Nenadic Z & Burdick JW (2005). Spike detection using the continuous wavelet transform. <i>IEEE T Bio-med Eng</i> , 52, 74-87.<br><br>Benitez R & Nenadic Z (2008). Robust unsupervised detection of action potentials with probabilistic models. <i>IEEE T Bio-med Eng</i> , 55(4), 1344-1354. | Continuous wavelet transform (CWT) method for template-based spike detection using the MATLAB function detect_Spikes_wavelet.m | detectSpike.m, getTemplate.m, customWavelet.m, detectSpikesWavelet.m ( <i>optional step in MEA-NAP</i> ) | <a href="http://cbmspc.eng.uci.edu/SOFTWARE/SPIKEDETECTION/detect_spikes_wavelet.m">http://cbmspc.eng.uci.edu/SOFTWARE/SPIKEDETECTION/detect_spikes_wavelet.m</a> .                                                                                                                                                 |
| Lieb F et al. (2017). A stationary wavelet transform and a time-frequency based spike detection algorithm for extracellular recorded data. <i>J Neural Eng</i> , 14(3), 036013.                                                                                                                | Stationary wavelet transform (SWTTEO) method for template-based spike detection.                                               | detectSpike.m ( <i>optional step in MEA-NAP</i> )                                                        | <a href="https://github.com/fliieb/SpikeDetection-Toolbox">https://github.com/fliieb/SpikeDetection-Toolbox</a>                                                                                                                                                                                                     |
| <b>Methods - Burst analysis</b>                                                                                                                                                                                                                                                                |                                                                                                                                |                                                                                                          |                                                                                                                                                                                                                                                                                                                     |
| Bakkum DJ, et al. (2014). Parameters for burst detection. <i>Front Comput Neurosci</i> , 7(193).                                                                                                                                                                                               | Method for burst detection. Based on ISI_N burst detector (Bakkum, 2013) using BurstDetectISIn.m & HistogramISIn.m (modified)  | BurstDetectISIn.m, getISInTh.m                                                                           | <a href="https://www.frontiersin.org/articles/file/downloadfile/61635_supplementary-materials_presentations_1_pdf/octet-stream/Presentation%201.PDF/1/61635">https://www.frontiersin.org/articles/file/downloadfile/61635_supplementary-materials_presentations_1_pdf/octet-stream/Presentation%201.PDF/1/61635</a> |
| <b>Methods - Functional connectivity</b>                                                                                                                                                                                                                                                       |                                                                                                                                |                                                                                                          |                                                                                                                                                                                                                                                                                                                     |
| Cutts CS & Eglén SJ (2014). Detecting pairwise correlations in spike trains: An objective comparison of methods and application to the study of retinal waves. <i>J Neurosci</i> , 34(43), 14288–14303.                                                                                        | Spike-time tiling coefficient (STTC)                                                                                           | get_sttc.m                                                                                               | <a href="https://github.com/Cutts/Detecting_pairwise_correlations_in_spike_trains/blob/master/spike_time_tiling_coefficient.c">https://github.com/Cutts/Detecting_pairwise_correlations_in_spike_trains/blob/master/spike_time_tiling_coefficient.c</a>                                                             |
| <b>Methods - Network features</b>                                                                                                                                                                                                                                                              |                                                                                                                                |                                                                                                          |                                                                                                                                                                                                                                                                                                                     |
| Rubinov M & Sporns O (2010). Complex network measures of brain connectivity: Uses and interpretations. <i>NeuroImage</i> , 52(3), 1059–1069.                                                                                                                                                   | Brain Connectivity Toolbox (BCT) for calculating graph theoretical metrics and null models.                                    | Functions in 2019_03_03_BCT folder, CC_PL_SW folder                                                      | <a href="http://www.brain-connectivity-toolbox.net/">http://www.brain-connectivity-toolbox.net/</a>                                                                                                                                                                                                                 |

|                                                                                                                                             |                                                                                                   |                           |                                                                                                                                                                                                                                               |
|---------------------------------------------------------------------------------------------------------------------------------------------|---------------------------------------------------------------------------------------------------|---------------------------|-----------------------------------------------------------------------------------------------------------------------------------------------------------------------------------------------------------------------------------------------|
| Pedersen M et al. (2019). Reducing module size bias of participation coefficient. BioRxiv. doi: 10.1101/747162. Retrieved December 8, 2021. | Normalizing the participation coefficient using random networks to preserve degree distribution   | participation_coef_norm.m | <a href="https://github.com/midvarnia/Dynamic_brain_connectivity_analysis">https://github.com/midvarnia/Dynamic_brain_connectivity_analysis</a>                                                                                               |
| Bettinardi RG (2017). getCommunicability(W,g,nQexp) MATLAB Central File Exchange. Retrieved June 6, 2022.                                   | Communicability function. (Used in fcn_find_hubs_wu.m for ExtractNetMet.m)                        | getCommunicability.m      | <a href="https://www.mathworks.com/matlabcentral/fileexchange/62987-getcommunicability-w-g-nqexp">https://www.mathworks.com/matlabcentral/fileexchange/62987-getcommunicability-w-g-nqexp</a>                                                 |
| <b>Methods - Statistics</b>                                                                                                                 |                                                                                                   |                           |                                                                                                                                                                                                                                               |
| Trujillo-Ortiz A., et al. (2004). RMAOV1:One-way repeated measures ANOVA. MATLAB Central File Exchange. Retrieved August 3, 2023.           | One-way repeated measures ANOVA                                                                   | RMAOV1.m                  | <a href="https://www.mathworks.com/matlabcentral/fileexchange/5576-rmaov1">https://www.mathworks.com/matlabcentral/fileexchange/5576-rmaov1</a>                                                                                               |
| Schurger A (2005). Two-way repeated measures ANOVA. MATLAB Central File Exchange. Retrieved August 3, 2023.                                 | Two-factor, within-subject repeated measures ANOVA                                                | rm_anova2.m               | <a href="https://www.mathworks.com/matlabcentral/fileexchange/6874-two-way-repeated-measures-anova">https://www.mathworks.com/matlabcentral/fileexchange/6874-two-way-repeated-measures-anova</a>                                             |
| <b>Tools - GUI</b>                                                                                                                          |                                                                                                   |                           |                                                                                                                                                                                                                                               |
| Hoelzer S (2010). Progress bar. MATLAB Central File Exchange. Retrieved December 8, 2021.                                                   | Progress bar                                                                                      | progressbar.m             | <a href="https://www.mathworks.com/matlabcentral/fileexchange/6922-progressbar">https://www.mathworks.com/matlabcentral/fileexchange/6922-progressbar</a>                                                                                     |
| <b>Tools - Plotting</b>                                                                                                                     |                                                                                                   |                           |                                                                                                                                                                                                                                               |
| Marsh G (2016). LOESS regression smoothing. MATLAB Central File Exchange. Retrieved June 23, 2023.                                          | Smoothing function using LOESS (locally weighted regression fitting using a 2nd order polynomial) | fLOESS.m, getISInTh.m     | <a href="https://www.mathworks.com/matlabcentral/fileexchange/55407-loess-regression-smoothing">https://www.mathworks.com/matlabcentral/fileexchange/55407-loess-regression-smoothing</a>                                                     |
| Lee T (2006). Kernel density estimation of 2 dim with SJ bandwidth. MATLAB Central File Exchange. Retrieved June 23, 2023.                  | Kernel density estimator with Sheater Jones (SJ) bandwidth                                        | bandwidth_SJ.m, KDE2.m    | <a href="https://www.mathworks.com/matlabcentral/fileexchange/10921-kernel-density-estimation-of-2-dim-with-sj-bandwidth">https://www.mathworks.com/matlabcentral/fileexchange/10921-kernel-density-estimation-of-2-dim-with-sj-bandwidth</a> |

|                                                                                                           |                                                                                   |                             |                                                                                                                                                                                                                 |
|-----------------------------------------------------------------------------------------------------------|-----------------------------------------------------------------------------------|-----------------------------|-----------------------------------------------------------------------------------------------------------------------------------------------------------------------------------------------------------------|
| Botev Z (2015). Kernel density estimator. MATLAB Central File Exchange. Retrieved June 23, 2023.          | Faster kernel density estimator                                                   | improvedSJKde.m             | <a href="https://www.mathworks.com/matlabcentral/fileexchange/14034-kernel-density-estimator">https://www.mathworks.com/matlabcentral/fileexchange/14034-kernel-density-estimator</a>                           |
| Thyng KM, et al. (2016). True colors of oceanography. <i>Oceanography</i> , 29(3), 10.                    | Colormap generator                                                                | cmocean.m                   | <a href="https://matplotlib.org/cmocean/">https://matplotlib.org/cmocean/</a>                                                                                                                                   |
| Kumpulainen K (2016). tight_subplot. MATLAB Central File Exchange. Retrieved June 19, 2023.               | Creates axes subplots with adjustable margins and gaps between the axes           | tight_subplot.m             | <a href="https://www.mathworks.com/matlabcentral/fileexchange/27991-tight_subplot-nh-nw-gap-marg_h-marg_w">https://www.mathworks.com/matlabcentral/fileexchange/27991-tight_subplot-nh-nw-gap-marg_h-marg_w</a> |
| Schwizer J (2015). Scalable vector graphics export of figures (fig2svg). GitHub. Retrieved June 16, 2022. | Converts MATLAB plots to the scalable vector format (SVG)                         | Functions in fig2svg folder | <a href="https://github.com/jschwizer99/plot2svg">https://github.com/jschwizer99/plot2svg</a>                                                                                                                   |
| Campbell R (2020). notBoxPlot. GitHub. Retrieved December 8, 2021.                                        | Plots raw data as a jitter, mean, s.e.m., and 95% confidence intervals (modified) | notBoxPlotRF.m              | <a href="https://github.com/raacampbell/notBoxPlot">https://github.com/raacampbell/notBoxPlot</a>                                                                                                               |

| <b>Supplemental Table 2. Comparison with other publicly available MEA analysis or functional connectivity tools</b> |                             |                        |                                     |                                          |                        |                             |                                |
|---------------------------------------------------------------------------------------------------------------------|-----------------------------|------------------------|-------------------------------------|------------------------------------------|------------------------|-----------------------------|--------------------------------|
|                                                                                                                     | <b>Adapted for MEA data</b> | <b>Spike Detection</b> | <b>Neuronal activity comparison</b> | <b>Inferring functional connectivity</b> | <b>Network metrics</b> | <b>Statistical analysis</b> | <b>Visualization &amp; GUI</b> |
| <b>MEA-NAP</b>                                                                                                      | ●                           | ●                      | ○                                   | ●                                        | ●                      | ●                           | ○                              |
| Brain Connectivity Toolbox                                                                                          |                             |                        |                                     | ●                                        | ●                      | ●                           |                                |
| MEA-ToolBox                                                                                                         | ●                           | ○                      | ○                                   | ○                                        |                        |                             | ○                              |
| MEAnalyzer                                                                                                          | ●                           | ○                      | ○                                   | ○                                        | ○                      |                             | ○                              |
| meaRtools                                                                                                           | ●                           |                        | ○                                   | ○                                        |                        | ●                           |                                |
| BSMART                                                                                                              |                             |                        |                                     | ○                                        | ●                      |                             |                                |
| ToolConnect                                                                                                         | ●                           |                        |                                     | ○                                        | ●                      |                             | ○                              |
| SPICODYN                                                                                                            | ●                           |                        | ○                                   | ○                                        | ○                      |                             | ○                              |
| <i>Table Legend: Closed circle = many features; Open circle = limited features</i>                                  |                             |                        |                                     |                                          |                        |                             |                                |



| <b>Supplemental Table 3. Publicly available MEA analysis or functional connectivity toolboxes</b> |                                                                                                                                                                                                                                                                                                                                                                                                                                                                                                                                                                                                                                                                                                                                                                                                                                                                                                        |
|---------------------------------------------------------------------------------------------------|--------------------------------------------------------------------------------------------------------------------------------------------------------------------------------------------------------------------------------------------------------------------------------------------------------------------------------------------------------------------------------------------------------------------------------------------------------------------------------------------------------------------------------------------------------------------------------------------------------------------------------------------------------------------------------------------------------------------------------------------------------------------------------------------------------------------------------------------------------------------------------------------------------|
| Method                                                                                            | Features                                                                                                                                                                                                                                                                                                                                                                                                                                                                                                                                                                                                                                                                                                                                                                                                                                                                                               |
| <b>MEA data analysis tools</b>                                                                    |                                                                                                                                                                                                                                                                                                                                                                                                                                                                                                                                                                                                                                                                                                                                                                                                                                                                                                        |
| MEA-ToolBox (MATLAB)                                                                              | <p>Source: <a href="https://github.com/DrJPFrimat/MEA-ToolBox">https://github.com/DrJPFrimat/MEA-ToolBox</a></p> <p>Features:</p> <ul style="list-style-type: none"> <li>• File conversion &amp; filtering of raw MCS MEA data</li> <li>• Threshold-based spike detection with artifact removal</li> <li>• Single channel burst detection with max interval &amp; log ISI method (from Cotterill et al., 2016)</li> <li>• Network burst detection</li> <li>• Cross-correlation to infer functional connectivity</li> <li>• Synchronicity (pairwise) using ISI distance method</li> <li>• Spike sorting</li> <li>• GUI with data visualizations</li> </ul> <p>Reference: Hu M, Frega M, Tolner EA, van den Maagdenberg AMJM, Frimat JP, le Feber J. MEA-ToolBox: an Open Source Toolbox for Standardized Analysis of Multi-Electrode Array Data. <i>Neuroinformatics</i>. 2022 Oct;20(4):1077-1092.</p> |
| MEAnalyzer (MATLAB)                                                                               | <p>Source: <a href="https://github.com/RDastgh1/MEAnalyzer">https://github.com/RDastgh1/MEAnalyzer</a></p> <p>Features:</p> <ul style="list-style-type: none"> <li>• Spike detection with threshold method</li> <li>• Spike and burst features</li> <li>• Cross-correlation or overlapping spikes or bursts to infer functional connectivity</li> <li>• Graph metrics (node degree, global efficiency, network size and network density)</li> </ul> <p>Reference: Dastgheyb RM, Yoo SW, Haughey NJ. (2020) MEAnalyzer - a Spike Train Analysis Tool for Multi Electrode Arrays. <i>Neuroinformatics</i>, 18(1):163-179.</p>                                                                                                                                                                                                                                                                            |
| meaRtools (R)                                                                                     | <p>Source: <a href="https://cran.r-project.org/src/contrib/Archive/meaRtools/">https://cran.r-project.org/src/contrib/Archive/meaRtools/</a></p> <p>Features:</p> <ul style="list-style-type: none"> <li>• Spike features (no spike detection)</li> <li>• Single channel burst features</li> <li>• Burst and network burst features</li> <li>• Spike-time tiling coefficient (mean per network)</li> <li>• Entropy (mean per network)</li> <li>• Mutual Information (pairwise comparison of patterns in spike trains)</li> </ul> <p>Reference: Gelfman S, Wang Q, Lu YF, Hall D, Bostick CD, Dhindsa R, Halvorsen M, McSweeney KM, Cotterill E, Edinburgh T, Beaumont MA, Frankel WN, Petrovski S, Allen AS, Boland MJ, Goldstein DB, Eglen SJ (2018). meaRtools: An R package for the analysis of neuronal networks recorded on microelectrode arrays. <i>PLoS Comput Biol</i>,14(10):e1006506.</p>   |
| FIND (previously MEA-                                                                             | Source:                                                                                                                                                                                                                                                                                                                                                                                                                                                                                                                                                                                                                                                                                                                                                                                                                                                                                                |

|                                          |                                                                                                                                                                                                                                                                                                                                                                                                                                                                                                                                                                                                                                                                                                                                                                                                                                                                                                                                                                    |
|------------------------------------------|--------------------------------------------------------------------------------------------------------------------------------------------------------------------------------------------------------------------------------------------------------------------------------------------------------------------------------------------------------------------------------------------------------------------------------------------------------------------------------------------------------------------------------------------------------------------------------------------------------------------------------------------------------------------------------------------------------------------------------------------------------------------------------------------------------------------------------------------------------------------------------------------------------------------------------------------------------------------|
| tools) (MATLAB)                          | <p><a href="https://web.archive.org/web/20060910130103/http://www.brainworks.uni-freiburg.de/projects/mea/meatools/install_instructions.html">https://web.archive.org/web/20060910130103/http://www.brainworks.uni-freiburg.de/projects/mea/meatools/install_instructions.html</a></p> <p>Features:</p> <ul style="list-style-type: none"> <li>● Identification of local field potentials &amp; extracellular spike times &amp; waveforms (method not specified)</li> <li>● Basic spike sorting with principal component analysis</li> <li>● GUI with limited data visualizations</li> </ul> <p>Reference: Egert U, Knott T, Schwarz C, Nawrot M, Brandt A, Rotter S, Diesmann M. (2002) MEA-Tools: an open source toolbox for the analysis of multi-electrode data with MATLAB. <i>J Neurosci Methods</i>, 117(1):33-42. Meier R, Egert U, Aertsen A, Nawrot MP. (2008) FIND-a unified framework for neural data analysis. <i>Neural Netw</i>, 21(8):1085-93.</p> |
| MEA Viewer (Python)                      | <p>Source: <a href="https://github.com/dbridges/mea-tools">https://github.com/dbridges/mea-tools</a></p> <p>Features:</p> <ul style="list-style-type: none"> <li>● Spike detection with threshold method</li> <li>● GUI to view and examine spike detection</li> </ul> <p>Reference: Bridges DC, Tovar KR, Wu B, Hansma PK, Kosik KS. (2018). MEA Viewer: A high-performance interactive application for visualizing electrophysiological data. <i>PLoS One</i>, 13(2):e0192477.</p>                                                                                                                                                                                                                                                                                                                                                                                                                                                                               |
| McsMatlabDataTools (MATLAB)              | <p>Source: <a href="https://github.com/multichannelsystems/McsMatlabDataTools">https://github.com/multichannelsystems/McsMatlabDataTools</a></p> <p>Features:</p> <ul style="list-style-type: none"> <li>● Imports data from Multi-Channel System</li> <li>● Visualization tools for data</li> </ul> <p>Reference: Armin Walter (2022). <i>McsMatlabDataTools</i>, GitHub.</p>                                                                                                                                                                                                                                                                                                                                                                                                                                                                                                                                                                                     |
| Multiwell Analyzer (Windows application) | <p>Source: <a href="https://www.multichannelsystems.com/software/multiwell-analyzer">https://www.multichannelsystems.com/software/multiwell-analyzer</a></p> <p>Features:</p> <ul style="list-style-type: none"> <li>● For MCS multi-well MEA data</li> <li>● Spike detection with threshold or slope method</li> <li>● Single-channel and network burst detection</li> </ul> <p>Reference: Multi-channel Systems software (publicly available)</p>                                                                                                                                                                                                                                                                                                                                                                                                                                                                                                                |
| SPICODYN (C/Visual Studio)               | <p>Source: <a href="https://www.nitrc.org/projects/spicodyn/">https://www.nitrc.org/projects/spicodyn/</a></p> <p>Features:</p> <ul style="list-style-type: none"> <li>● Spike detection with threshold methods</li> <li>● Burst detection</li> <li>● Infer functional connectivity with transfer entropy method</li> <li>● Graph theoretical metrics (degree, path length, clustering coefficient, hubs, small-world index)</li> <li>● Visualization tools in GUI</li> </ul> <p>Reference: Pastore VP, Godjoski A, Martinoia S, Massobrio P. (2018) SPICODYN: A Toolbox for the Analysis of Neuronal Network Dynamics and Connectivity from Multi-Site Spike Signal Recordings.</p>                                                                                                                                                                                                                                                                               |

|                                                                                                                                                                    |                                                                                                                                                                                                                                                                                                                                                                                                                                                                                                                                                                                                                                                                                             |
|--------------------------------------------------------------------------------------------------------------------------------------------------------------------|---------------------------------------------------------------------------------------------------------------------------------------------------------------------------------------------------------------------------------------------------------------------------------------------------------------------------------------------------------------------------------------------------------------------------------------------------------------------------------------------------------------------------------------------------------------------------------------------------------------------------------------------------------------------------------------------|
|                                                                                                                                                                    | Neuroinformatics, 16(1):15-30.                                                                                                                                                                                                                                                                                                                                                                                                                                                                                                                                                                                                                                                              |
| SPKtool (MATLAB)                                                                                                                                                   | <p>Source: <a href="https://spktool.sourceforge.net/">https://spktool.sourceforge.net/</a></p> <p>Features:</p> <ul style="list-style-type: none"> <li>● Spike detection via threshold method</li> <li>● Spike features</li> <li>● Spike sorting</li> <li>● Cross-correlograms</li> </ul> <p>Reference: Liu X, Wu X, Liu C (2011). SPKtool: An open source toolbox for electrophysiological data processing," 2011 4th International Conference on Biomedical Engineering and Informatics (BMEI), Shanghai, China, 2011, pp. 854-857.</p>                                                                                                                                                   |
| SPYCODE (MATLAB)                                                                                                                                                   | <p>Source: Bologna et al. (2010) requires prospective users to email senior author to obtain code.</p> <p>Features:</p> <ul style="list-style-type: none"> <li>● Spike detection with threshold methods and spike features</li> <li>● Network spike and burst features</li> <li>● Infer functional connectivity with cross-correlation and/or information theoretical approaches</li> <li>● Neuronal avalanche detection (features within bursts)</li> </ul> <p>Reference: Bologna LL, Pasquale V, Garofalo M, Gandolfo M, Baljon PL, Maccione A, Martinoia S, Chiappalone M. (2010) Investigating neuronal activity by SPYCODE multi-channel data analyzer. Neural Netw, 23(6):685-97.</p> |
| ToolConnect (C/Visual Studio)                                                                                                                                      | <p>Source: <a href="https://www.nitrc.org/projects/toolconnect/">https://www.nitrc.org/projects/toolconnect/</a></p> <p>Features:</p> <ul style="list-style-type: none"> <li>● Infer functional connection from cross-correlation or partial-correlation methods</li> <li>● Information theory (joint entropy, transfer entropy) based core algorithms</li> <li>● Visualization tools in GUI</li> </ul> <p>Reference: Pastore VP, Poli D, Godjoski A, Martinoia S, Massobrio P. (2016) ToolConnect: a functional connectivity toolbox for in vitro networks. Front Neuroinform, 10:13.</p>                                                                                                  |
| <b>Functional connectivity, network topology and network dynamics tools (not designed or specific to MCS 60-electrode or Axion 64-electrode MEA data analysis)</b> |                                                                                                                                                                                                                                                                                                                                                                                                                                                                                                                                                                                                                                                                                             |
| Brain connectivity Toolbox (MATLAB)                                                                                                                                | <p>Source: <a href="http://www.brain-connectivity-toolbox.net/">http://www.brain-connectivity-toolbox.net/</a></p> <p>Features:</p> <ul style="list-style-type: none"> <li>● Extensive graph theoretical metrics functions</li> <li>● Tool commonly used for macroscale networks (especially neuroimaging)</li> <li>● Statistical methods available through associated toolboxes (e.g., Zalesky et al., 2010. Network-based statistic: identifying differences in brain networks. Neuroimage, 53(4):1197-207)</li> <li>● Requires knowledge of network neuroscience to use</li> </ul> <p>Reference: Rubinov M &amp; Sporns O (2010). Complex network</p>                                    |

|                                      |                                                                                                                                                                                                                                                                                                                                                                                                                                                                                                                                                                                                                                                                                                                                                                                                          |
|--------------------------------------|----------------------------------------------------------------------------------------------------------------------------------------------------------------------------------------------------------------------------------------------------------------------------------------------------------------------------------------------------------------------------------------------------------------------------------------------------------------------------------------------------------------------------------------------------------------------------------------------------------------------------------------------------------------------------------------------------------------------------------------------------------------------------------------------------------|
|                                      | measures of brain connectivity: Uses and interpretations. <i>NeuroImage</i> , 52(3), 1059–1069.                                                                                                                                                                                                                                                                                                                                                                                                                                                                                                                                                                                                                                                                                                          |
| BSMART (MATLAB/C)                    | Source: <a href="https://github.com/brain-smart/brain-smart.github.io">https://github.com/brain-smart/brain-smart.github.io</a><br>Features: <ul style="list-style-type: none"> <li>• For 15 electrode, EEG, MEG or fMRI data</li> <li>• Multivariate autoregressive (MAR) analysis</li> <li>• Spectral analysis</li> <li>• Granger causality</li> <li>• Requires knowledge of network neuroscience to use</li> </ul> Reference: Cui J, Xu L, Bressler SL, Ding M, Liang H. (2008) BSMART: a Matlab/C toolbox for analysis of multichannel neural time series. <i>Neural Netw</i> , 21(8):1094-104.                                                                                                                                                                                                      |
| Chronux (MATLAB)                     | Source: <a href="http://chronux.org/">http://chronux.org/</a><br>Features: <ul style="list-style-type: none"> <li>• Spike sorting</li> <li>• Spectral analysis</li> <li>• Coherence</li> </ul> Reference: Bokil H, Andrews P, Kulkarni JE, Mehta S, Mitra PP. (2010). Chronux: a platform for analyzing neural signals. <i>J Neurosci Methods</i> , 192(1):146-51.                                                                                                                                                                                                                                                                                                                                                                                                                                       |
| Elephant (Python)                    | Source: <a href="https://elephant.readthedocs.io/en/latest/modules.html">https://elephant.readthedocs.io/en/latest/modules.html</a><br>Features: <ul style="list-style-type: none"> <li>• Designed for LFP and spike train analysis</li> <li>• Spike train statistics</li> <li>• Spike train correlation, synchrony, dissimilarity</li> <li>• Require knowledge of python and network neuroscience to use with MEA data</li> </ul> Reference: Denker M, Yegenoglu A, Grün S (2018). Collaborative HPC-enabled workflows on the HBP Collaboratory using the Elephant framework. <i>Neuroinformatics</i> , P19.                                                                                                                                                                                            |
| Graphene-Electrode-Seizures (MATLAB) | Source: <a href="https://github.com/BassettLab/Graphene-Electrode-Seizures">https://github.com/BassettLab/Graphene-Electrode-Seizures</a><br>Features: <ul style="list-style-type: none"> <li>• Designed for 16-electrode graphene MEA</li> <li>• Non-negative matrix factorization to show seizure progression</li> <li>• Limited documentation</li> <li>• Code source from research article, requires knowledge of MATLAB to apply to MEA data</li> </ul> Reference: Driscoll N, Rosch RE, Murphy BB, Ashourvan A, Vishnubhotla R, Dickens OO, Johnson ATC, Davis KA, Litt B, Bassett DS, Takano H, Vitale F. (2021) Multimodal in vivo recording using transparent graphene microelectrodes illuminates spatiotemporal seizure dynamics at the microscale. <i>Commun Biol</i> . 2021 Jan 29;4(1):136. |
| nSTAT (MATLAB)                       | Source: <a href="https://github.com/iahncajigas/nSTAT">https://github.com/iahncajigas/nSTAT</a><br>Features:                                                                                                                                                                                                                                                                                                                                                                                                                                                                                                                                                                                                                                                                                             |

|                     |                                                                                                                                                                                                                                                                                                                                                                                                                                                                                                                                                                           |
|---------------------|---------------------------------------------------------------------------------------------------------------------------------------------------------------------------------------------------------------------------------------------------------------------------------------------------------------------------------------------------------------------------------------------------------------------------------------------------------------------------------------------------------------------------------------------------------------------------|
|                     | <ul style="list-style-type: none"> <li>● Point process – generalized linear model for spike trains</li> <li>● Requires knowledge of MATLAB to apply to MEA data</li> </ul> <p>Reference: Cajigas I, Malik WQ, Brown EN. (2012) nSTAT: open-source neural spike train analysis toolbox for Matlab. <i>J Neurosci Methods</i>, 211(2):245-64.</p>                                                                                                                                                                                                                           |
| STAToolkit (MATLAB) | <p>Source: <a href="http://neuroanalysis.org/">http://neuroanalysis.org/</a> (<i>unable to access code from link</i>)</p> <p>Features:</p> <ul style="list-style-type: none"> <li>● Information-theoretic methods</li> <li>● Entropy-based spike train analysis methods</li> <li>● Requires knowledge of ? to apply to MEA data</li> </ul> <p>Reference: Goldberg DH, Victor JD, Gardner EP, Gardner D. (2009) Spike train analysis toolkit: enabling wider application of information-theoretic techniques to neurophysiology. <i>Neuroinformatics</i>, 7(3):165-78.</p> |

## Supplemental References

Bassett, D. S., & Bullmore, E. T. (2009). Human brain networks in health and disease. *Current Opinion in Neurology*, 22(4), 340–347. <https://doi.org/10.1097/WCO.0b013e32832d93dd>

Brandes, U. (2001). A faster algorithm for betweenness centrality. *Journal of Mathematical Sociology*, 25(2), 163–177. <https://doi.org/10.1080/0022250X.2001.9990249>

Brandes, U., Delling, D., Gaertler, M., Gorke, R., Hofer, M., Nikoloski, Z., & Wagner, D. (2008). On modularity clustering. *IEEE Transactions on Knowledge and Data Engineering*, 20(2), 172–188. <https://doi.org/10.1109/TKDE.2007.190689>

Cutts, C. S., & Eglon, S. J. (2014). Detecting pairwise correlations in spike trains: An objective comparison of methods and application to the study of retinal waves. *J Neurosci.*, 34(43), 14288–14303. <https://doi.org/10.1523/JNEUROSCI.2767-14.2014>

Elsayed, G. F., & Cunningham, J. P. (2017). Structure in neural population recordings: An expected byproduct of simpler phenomena? *Nature Neuroscience*, 20(9), 1310–1318. <https://doi.org/10.1038/nn.4617>

Fornito, A., Zalesky, A., & Bullmore, E. T. (Eds.). (2016). Chapter 11—Statistical connectomics. In *Fundamentals of Brain Network Analysis* (pp. 383–419). Academic Press. <https://doi.org/10.1016/B978-0-12-407908-3.00011-X>

Guimerà, R., & Nunes Amaral, L. A. (2005). Functional cartography of complex metabolic networks. *Nature*, 433(7028), 895–900. <https://doi.org/10.1038/nature03288>

Humphries, M.D., Gurney, K., Prescott TJ. (2006). The brainstem reticular formation is a small-world, not scale-free, network. *Proc Biol Sci* 273(1585):503–11.

Humphries, M.D., Gurney, K. (2008). Network ‘small-world-ness’: a quantitative method for determining canonical network equivalence. *PLoS ONE* 3(4): e0002051. <https://doi.org/10.1371/journal.pone.0002051>

Latora, V., & Marchiori, M. (2001). Efficient behavior of small-world networks. *Physical Review Letters*, 87(19), 198701. <https://doi.org/10.1103/PhysRevLett.87.198701>

Lancichinetti, A., Fortunato, S. Consensus clustering in complex networks. *Sci Rep* 2, 336 (2012). <https://doi.org/10.1038/srep00336>

Roy, O. & Vetterli, M. (2007), The effective rank: a measure of effective dimensionality. In '2007 15th European Signal Processing Conference', pp. 606–610.

Rubinov, M., & Sporns, O. (2010). Complex network measures of brain connectivity: uses and interpretations. *NeuroImage*, 52(3), 1059–1069. <https://doi.org/10.1016/j.neuroimage.2009.10.003>

Schroeter, M. S., Charlesworth, P., Kitzbichler, M. G., Paulsen, O., & Bullmore, E. T. (2015). Emergence of rich-club topology and coordinated dynamics in development of hippocampal functional networks in vitro. *J Neurosci.*, 35(14), 5459–5470. <https://doi.org/10.1523/JNEUROSCI.4259-14.2015>

Serrano, M. Á., Boguñá, M., & Vespignani, A. (2009). Extracting the multiscale backbone of complex weighted networks. *Proceedings of the National Academy of Sciences*, 106(16), 6483–6488. <https://doi.org/10.1073/pnas.0808904106>

Telesford, Q. K., Joyce, K. E., Hayasaka, S., Burdette, J. H., & Laurienti, P. J. (2011). The ubiquity of small-world networks. *Brain Connectivity*, 1(5), 367–375. <https://doi.org/10.1089/brain.2011.0038>
